# Supplementary material
Source: Springer Nature journal article supplement (https://www.springermedizin.de/resource/supplementary/12889_2010_2368_MOESM1_ESM.pdf/9485560)
Supplement: MOESM1 [file 9485560]

Newly referred patient < 75 years old,  
participating in the diabetes care system

Visit 1 (week 0): physical examination

Patient is not willing to  
participate

Patient is not eligible: has  
experienced a TIA or CVA

Written informed consent and baseline  
questionnaire

Randomisation

Control Group:  
Visit 2 (week 1-2) → standard care  
from the DCS at diabetes nurse and  
dietician

Intervention group:  
Visit 2 (week 1-2) → standard care  
from the DCS at diabetes nurse and  
dietician and intervention on risk  
communication

Questionnaire 2 (week 1-2):  
directly after visit 2

Questionnaire 2 (week 1-2):  
directly after visit 2

Questionnaire 3 (week 12)

Questionnaire 3 (week 12)
